# Supplementary material for: A Comparative Study on Physiochemical, Thermomechanical, and Electrochemical Properties of Sulfonated Poly(Ether Ether Ketone) Block Copolymer Membranes with and without Fe3O4 Nanoparticles
Source: PubMed Central journal article supplement (PMC6473931; doi:10.3390/polym11030536), 2019-03-21
Supplement: polymers-11-00536-s001.pdf [file polymers-11-00536-s001.pdf]

# A comparative study on physiochemical, thermomechanical and electrochemical properties of sulfonated poly(ether ether ketone) block copolymer membranes with and without $\text{Fe}_3\text{O}_4$ nanoparticles

## Supporting information

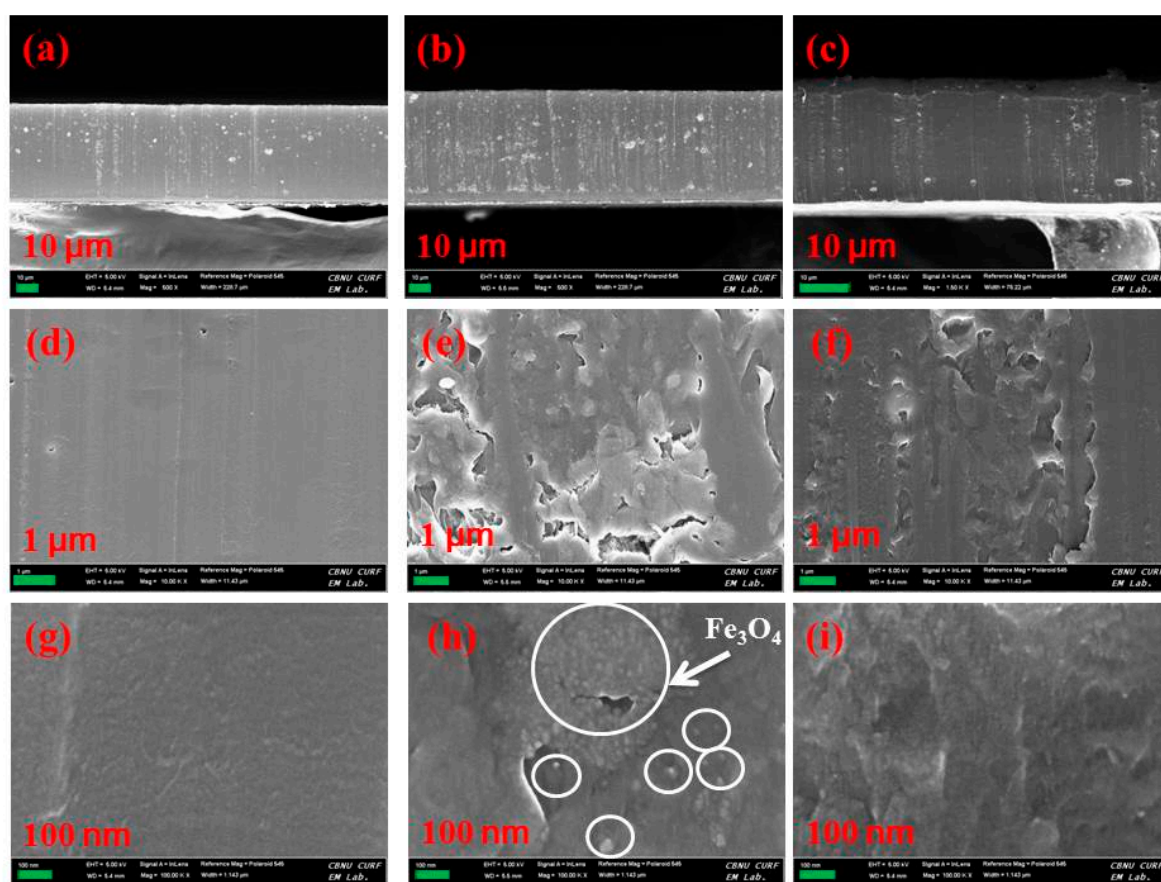

**Fig. S1.** Cross section FE-SEM images of (a, d and g) XY, (b, e and h) XY/ $\text{Fe}_3\text{O}_4$ -9 and (c, f and i) XY/(porous)-9 membranes.

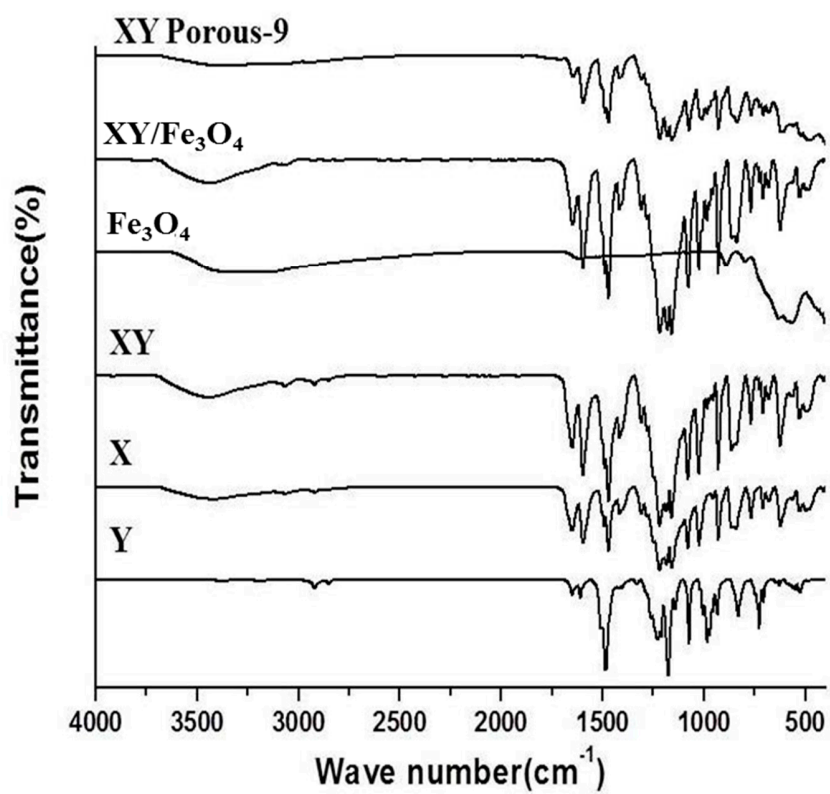

**Fig. S2.** FT-IR spectra of X, Y, composite and porous membranes.

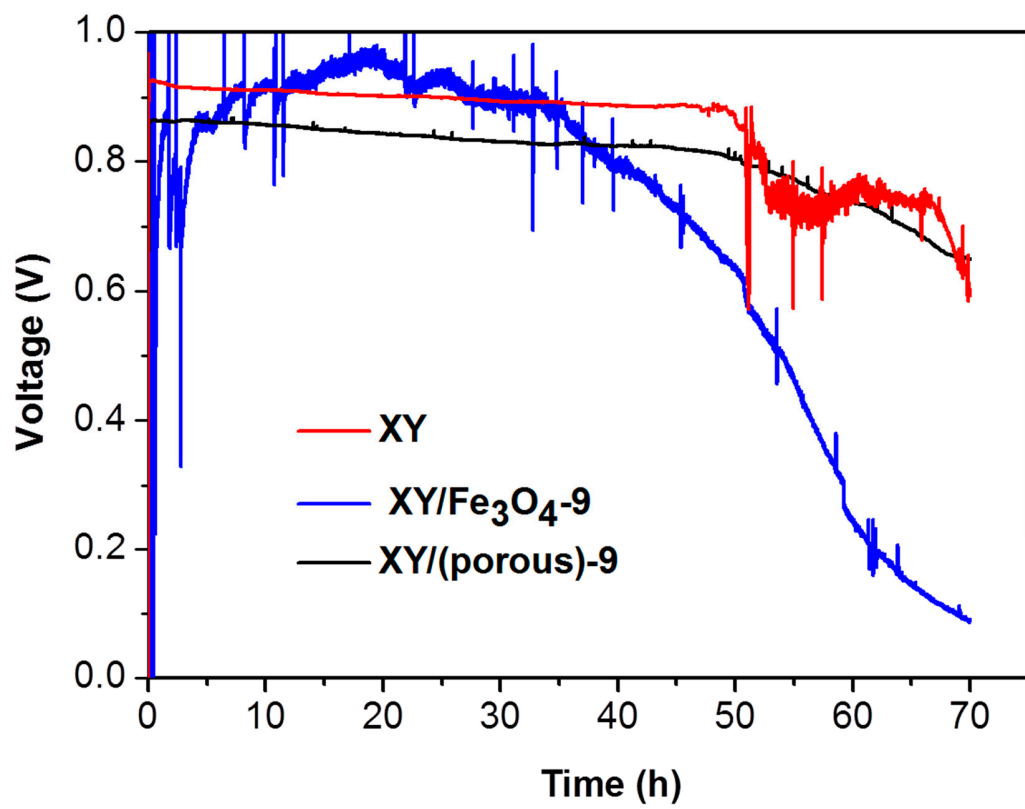

**Fig. S3.** Durability curves of XY, XY /Fe<sub>3</sub>O<sub>4</sub>-9 and XY/(porous)-9 membranes.
